# Supplementary material for: Pyruvate kinase M2 regulates homologous recombination-mediated DNA double-strand break repair
Source: PubMed Central journal article supplement (PMC6218445; doi:10.1038/s41422-018-0086-7), 2018-10-08
Supplement: 41422_2018_86_MOESM2_ESM.pdf [file 41422_2018_86_MOESM2_ESM.pdf]

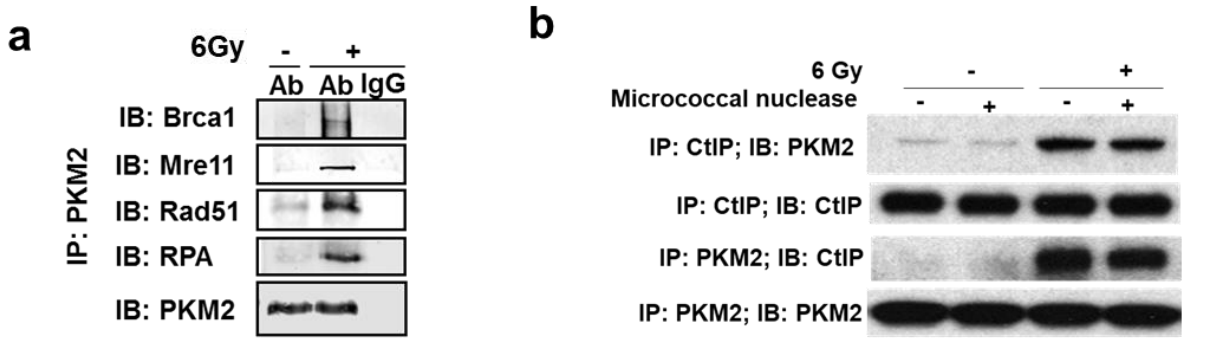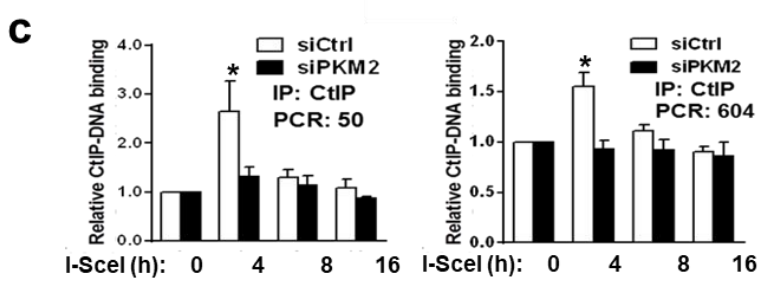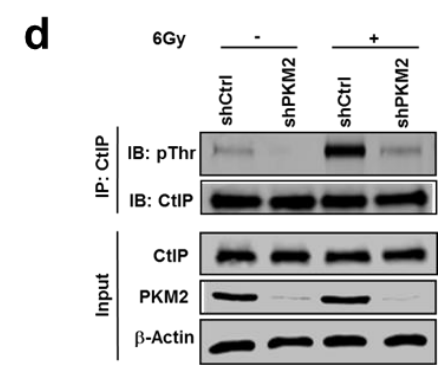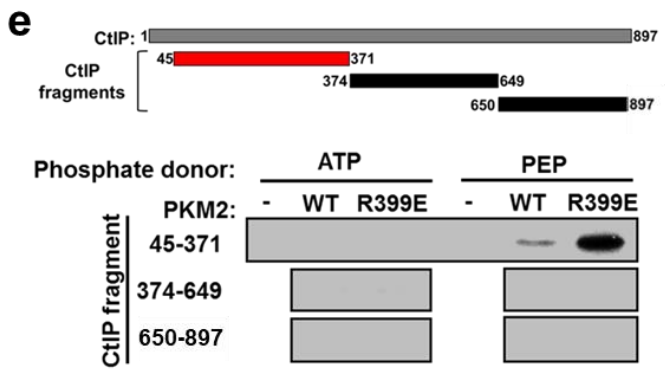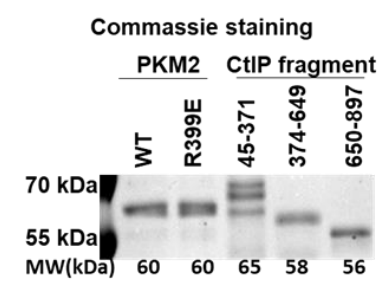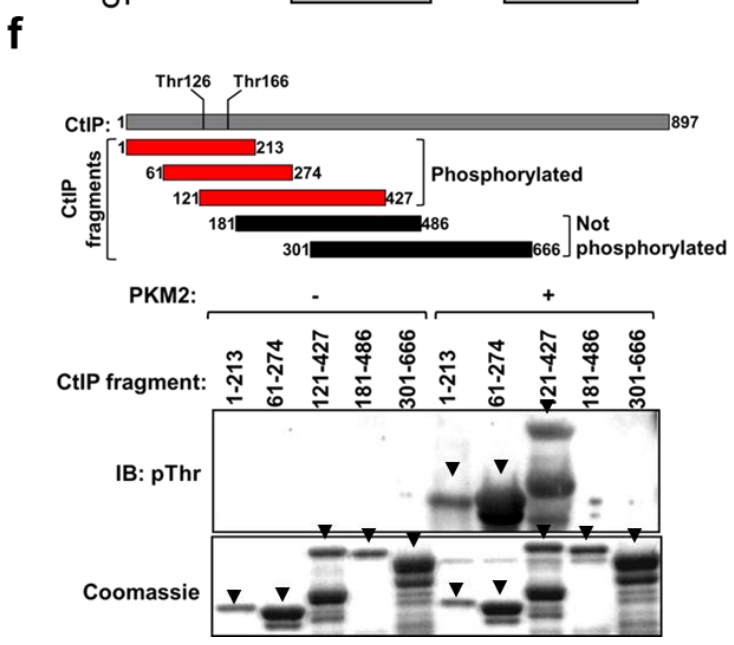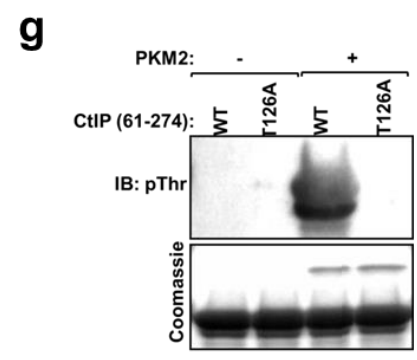

**Figure S2.** **a** Protein lysates were collected from U87 cells after irradiation and immunoprecipitated with PKM2 antibody or anti-rabbit IgG. Immunoprecipitates were separated by SDS-PAGE and immunoblotted with the indicated antibodies. **b** Protein lysates from unirradiated or irradiated U87 cells were collected, treated with micrococcal nuclease and immunoprecipitated with PKM2 and CtIP antibodies. Immunoprecipitates were analyzed by western blot. **c** HT1904 cells containing the I-SceI DSB system were utilized to assess CtIP binding 50 bp (left panel) and 604 bp (right panel) upstream of I-SceI-induced DSBs. Cells were transfected with control or PKM2-targeting siRNA. After 24 h, I-SceI adenovirus was introduced to create DSBs. At the indicated time points, CtIP-DNA complexes were harvested and CtIP binding was quantified by real-time PCR. Data are normalized to T=0 and presented as mean  $\pm$  SE (n = 3). **d** CtIP was immunoprecipitated from U87 shCtrl and shPKM2 cells treated with 0 or 6 Gy radiation. Immunoprecipitates were separated by SDS-PAGE and immunoblotted with antibodies to phosphothreonine and CtIP. Input protein lysates were also separated by SDS-PAGE and immunoblotted for CtIP, PKM2, or  $\beta$ -actin as a loading control. **e** A schematic illustrating the recombinant CtIP peptide fragments utilized as substrate for *in vitro* PKM2 kinase reactions. Kinase reactions were performed using either ATP or PEP as phosphate donor and in the absence (-) or presence of wild-type PKM2 (WT) or R399E-PKM2. Reactions were separated by SDS-PAGE and immunoblotted with anti-phosphothreonine antibody. **f** A schematic illustrating the recombinant CtIP peptide fragments utilized as substrate for *in vitro* PKM2 kinase reactions. Kinase reactions in the absence (-) or presence (+) of PKM2 were separated by SDS-PAGE and immunoblotted with anti-phosphothreonine antibody or stained with Coomassie. Arrowheads mark full-

length recombinant CtIP fragments. **g** CtIP fragment 61-274 (WT) or this fragment carrying a T126A mutation were utilized in kinase reactions in the absence (-) or presence of PKM2 (+). Kinase reactions were separated by SDS-PAGE and immunoblotted with anti-phosphothreonine antibody or stained with Coomassie.
