# Supplementary material for: Pyruvate kinase M2 regulates homologous recombination-mediated DNA double-strand break repair
Source: PubMed Central journal article supplement (PMC6218445; doi:10.1038/s41422-018-0086-7), 2018-10-08
Supplement: 41422_2018_86_MOESM3_ESM.pdf [file 41422_2018_86_MOESM3_ESM.pdf]

**a**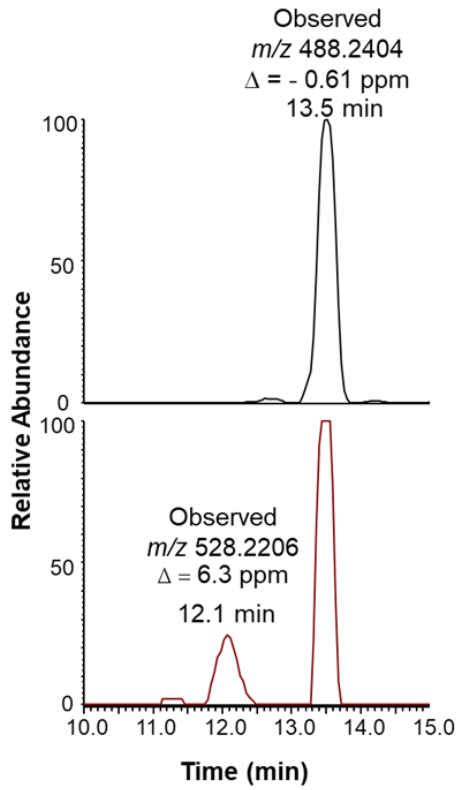**b**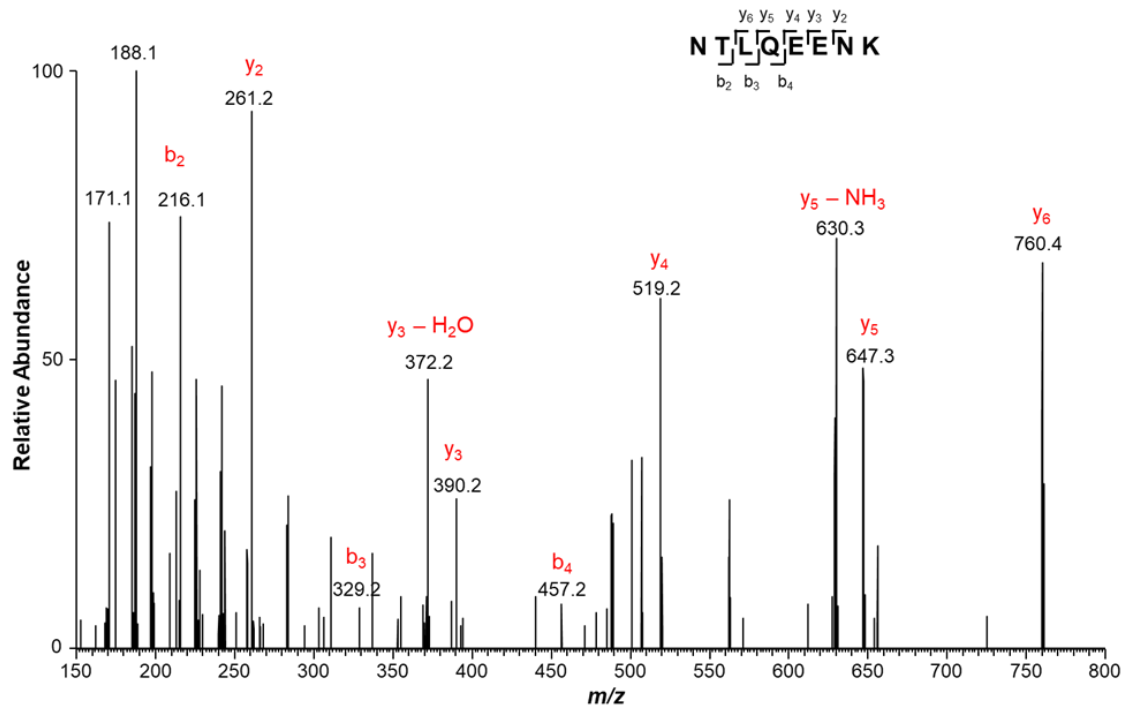

**Figure S3.** LC-MS and MS/MS for the identification of the unmodified CtIP peptide, NTLQEENK and the same peptide with Thr<sup>126</sup> being phosphorylated from the irradiated sample. **a** Selected-ion chromatogram for the  $[M + 2H]^{2+}$  ions of the unphosphorylated (top, calculated  $m/z$  488.2407) and phosphorylated (bottom, calculated  $m/z$  528.2239) peptide NTLQEENK. **b** Tandem mass spectrum (MS/MS) of the ESI-produced  $[M+2H]^{2+}$  ion of the unphosphorylated peptide NTLQEENK. The spectrum was acquired by LC-MS/MS in the data-dependent acquisition mode on a QE Plus quadrupole-Orbitrap mass spectrometer.
