# Supplementary material for: Pyruvate kinase M2 regulates homologous recombination-mediated DNA double-strand break repair
Source: PubMed Central journal article supplement (PMC6218445; doi:10.1038/s41422-018-0086-7), 2018-10-08
Supplement: 41422_2018_86_MOESM4_ESM.pdf [file 41422_2018_86_MOESM4_ESM.pdf]

**Figure S4. a** U87 cells were first treated with 200nM siRNA to deplete PKM1 and 48h later treated with 1 $\mu$ M CPT-11 to induce DNA damage. Cell lysates were collected 1h later and analyzed for pT126-CtIP. **b** Schematic of the resection assay utilizing HT1904 cells containing the I-SceI DSB system. A quantitative real-time PCR primer/probe set was used to measure DSBs generated by I-SceI (green), while another primer/probe set (red) was used to measure the presence of ssDNA extending beyond an XmaI site 328bp from the I-SceI site. XmaI cannot cut ssDNA. Knockdown of CtIP in this system significantly reduced resection of DNA adjacent to I-SceI-induced DSBs. Data are presented as mean  $\pm$  SE (n = 3). \*,  $P < 0.05$ . **c** Representative images of DMSO or CTP-11 treated U87 control, PKM2 knockdown, or CtIP knockdown cells stained for RPA (red). Nuclei are stained with DAPI (Blue). **d** Representative images of DMSO or CTP-11 treated U87 control, PKM2 knockdown, or CtIP knockdown cells stained for BrdU (red). Nuclei are stained with DAPI (Blue).
