# Supplementary material for: Pyruvate kinase M2 regulates homologous recombination-mediated DNA double-strand break repair
Source: PubMed Central journal article supplement (PMC6218445; doi:10.1038/s41422-018-0086-7), 2018-10-08
Supplement: 41422_2018_86_MOESM6_ESM.pdf [file 41422_2018_86_MOESM6_ESM.pdf]

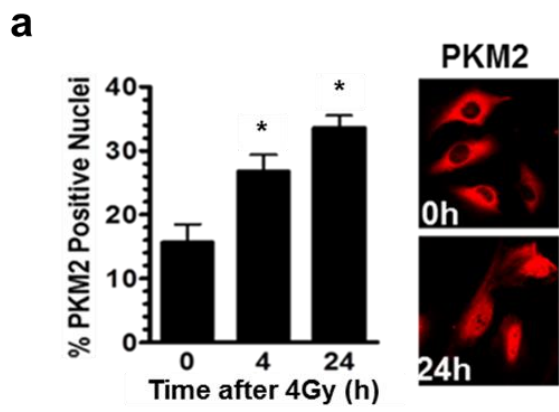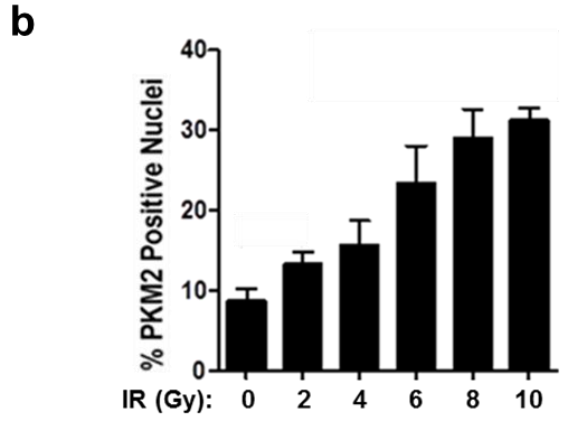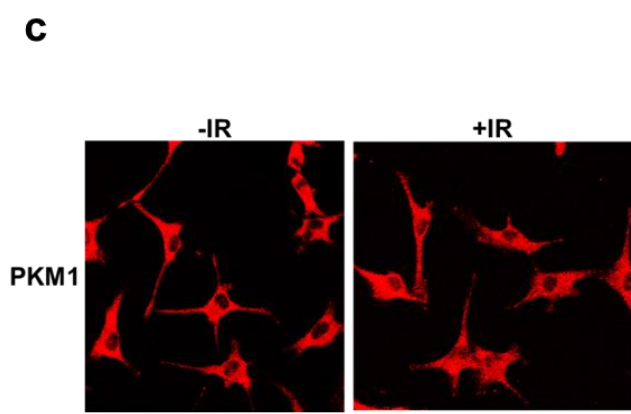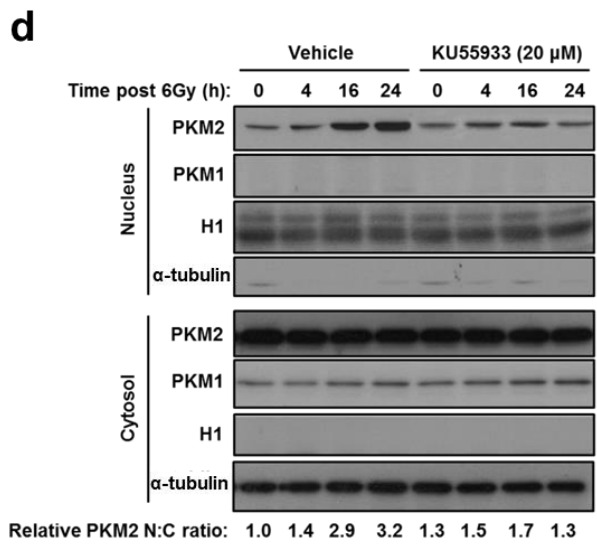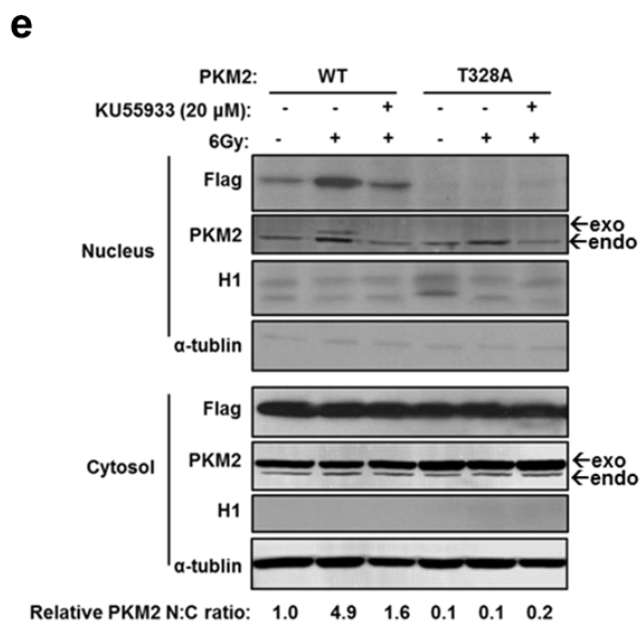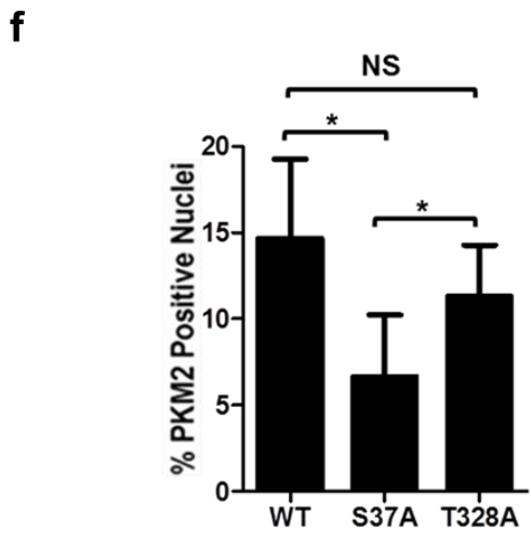

**Figure S6. a** U87 cells were irradiated and then fixed at the indicated time points, and PKM2 localization was determined by immunohistochemical staining. Data are the mean percentage of cells with nuclear PKM2 staining  $\pm$  SE ( $n = 3$ ). Photos represent typical PKM2 cytoplasmic staining seen at 0 h and increased nuclear PKM2 staining observed 24 h post-radiation. **b** U87 cells were irradiated with the indicated doses, fixed, and PKM2 subcellular localization was determined by immunohistochemical staining. Data are the mean percentage of cells with nuclear PKM2 staining  $\pm$  SE ( $n = 3$ ). **c** Representative images of immunohistochemical staining for PKM1 in U87 cells in the absence of radiation (left) or 24 h after treatment with 6 Gy (right). **d** U87 cells were treated with DMSO or KU55933 (20  $\mu$ M) and then subjected to radiation. Lysates were harvested at the indicated times and separated into nuclear and cytoplasmic fractions, which were resolved by SDS-PAGE and probed with antibodies to PKM2 and PKM1. Histone H1 served as the nuclear protein loading control while  $\alpha$ -tubulin was the cytoplasmic protein control. The relative ratio of nuclear (N) to cytoplasmic (C) PKM2 was quantitated using ImageJ software. **e** U87 shPKM2 cells expressing shRNA resistant, flag-tagged WT or T328A PKM2 were pre-treated with DMSO or KU55933 (20  $\mu$ M) and then irradiated. Cell lysates were collected and separated into nuclear and cytoplasmic fractions, which were resolved by SDS-PAGE and probed with antibodies to flag and PKM2. The relative ratio of nuclear (N) to cytoplasmic (C) PKM2 was quantitated using ImageJ software. **f** U87 shPKM2 cells expressing WT, S37A, or T328A PKM2 were treated with EGF (100 ng/mL), fixed, and PKM2 nuclear localization was determined by immunohistochemical staining. Data are presented as the mean percentage of cells with nuclear PKM2 staining  $\pm$  SE ( $n = 3$ ). \*,  $P < 0.05$ . NS, not significant.
