# Supplementary material for: Pyruvate kinase M2 regulates homologous recombination-mediated DNA double-strand break repair
Source: PubMed Central journal article supplement (PMC6218445; doi:10.1038/s41422-018-0086-7), 2018-10-08
Supplement: 41422_2018_86_MOESM9_ESM.pdf [file 41422_2018_86_MOESM9_ESM.pdf]

**a**

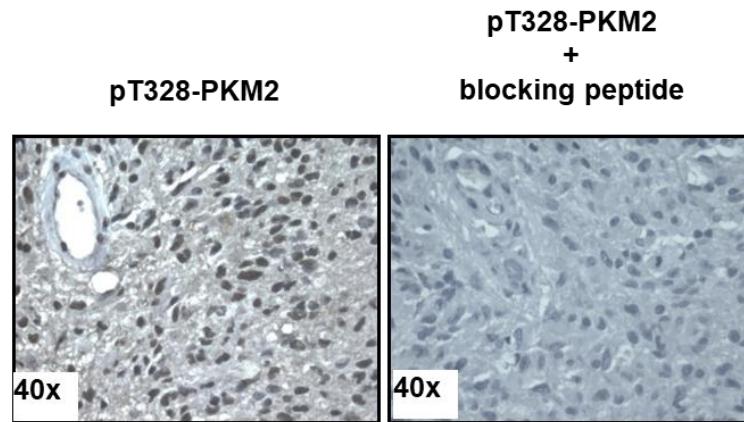

**b**

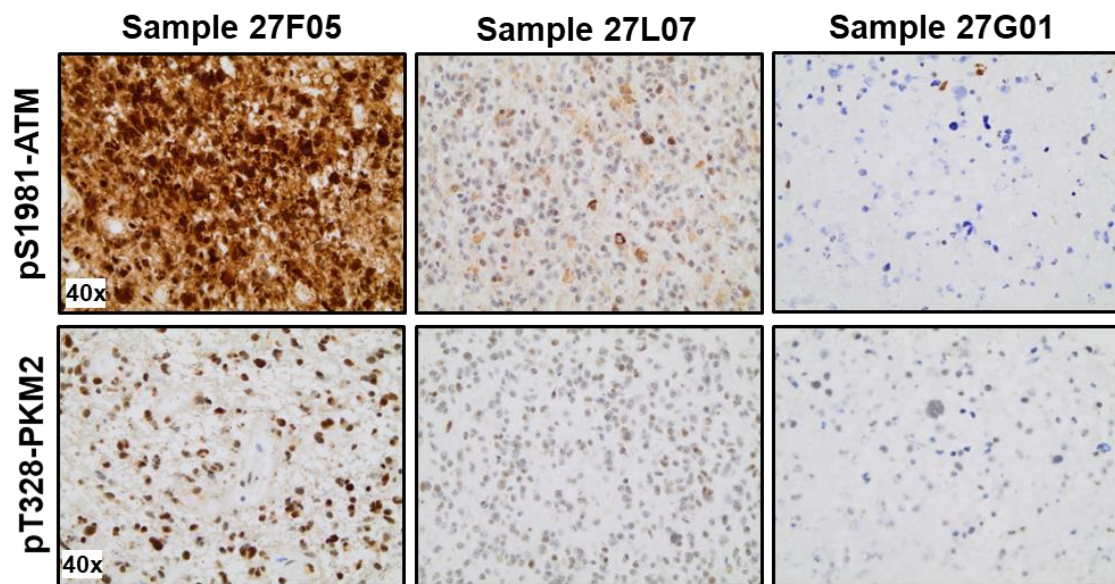

**Figure S9. a** Representative 40x images from a GBM patient sample stained with pT328-PKM2 antibody (left panel) or pT328-PKM2 antibody that was pre-incubated with phosphorylated blocking peptide. **b** Representative 40x images from three GBM patient samples illustrating the significant correlation ( $P = 0.005$ ) between pS1981-ATM staining (top panels) and nuclear pT328-PKM2 staining.
